# Supplementary material for: Maternal Immune Activation with High Molecular Weight Poly (I:C) Induces Selective Depressive-Like Phenotype in Adult Offspring
Source: Research Square preprint supplement (doi:10.21203/rs.3.rs-7131610/v1), 2025-07-23
Supplement: Supplementary file 1 [file 303df4b1d94be4cf10102c6c.docx]

**Table S1. Main effect of Sex on cytokines, chemokines, and growth factors expression.**

|  | **F value** | **P value** | **Bonferroni’s post hoc test** |
| --- | --- | --- | --- |
| **Pro- and anti-inflammatory cytokines** | | | |
| IL-1α | F(1,26) = 179.4 | P < 0.0001 | ***; ### |
| IL-1β | F(1,24) = 196.4 | P < 0.0001 | ***; ### |
| IL-4 | F(1,26) = 481.0 | P < 0.0001 | ***; ### |
| IL-5 | F(1,26) = 594.9 | P < 0.0001 | ***; ### |
| IL-6 | F(1,26) = 89.4 | P < 0.0001 | ***; ### |
| IL-7 | F(1,25) = 73.5 | P < 0.0001 | ***; ### |
| IL-10 | F(1,26) = 182.5 | P < 0.0001 | ***; ### |
| IL-12(p70) | F(1,26) = 5.2 | P = 0.0306 |  |
| IL-13 | F(1,26) = 127.8 | P < 0.0001 | ***; ### |
| IFN-γ | F(1,26) = 138.2 | P < 0.0001 | ***; ### |
| TNF-α | F(1,26) = 69.6 | P < 0.0001 | ***; ### |
| **Chemokines** | | | |
| MCP-1 | F(1,26) = 27.5 | P < 0.0001 | *; ### |
| MIP-1α | F(1,26) = 247.1 | P < 0.0001 | ***; ### |
| MIP-3α | F(1,26) = 239.9 | P < 0.0001 | ***; ### |
| RANTES | F(1,26) = 150.9 | P < 0.0001 | ***; ### |
| GRO/KC | F(1,26) = 25.5 | P < 0.0001 | ### |
| **Growth factors** | | | |
| GM-CSF | F(1,25) = 28.5 | P < 0.0001 | **; ### |
| G-CSF | F(1,26) = 89.1 | P < 0.0001 | ***; ### |
| VEGF | F(1,26) = 8.4 | P = 0.0074 | * |

Statistical results: Two-way ANOVA, significant main effect of sex on cytokines, chemokines, and growth factors expression. *p < 0.05; **p < 0.01; ***p < 0.001 male control vs. female control. ###p < 0.001 male Poly (I:C) vs. female Poly (I:C).
